# Supplementary material for: Non-invasive electrical stimulation restores corneal nerve density and function in diabetic neuropathy via KCNN-dependent mechanism
Source: Research Square preprint supplement (doi:10.21203/rs.3.rs-7895492/v1), 2025-12-01
Supplement: Supplementary file 1 [file 3535a3191e01b407d72818c9.pdf]

Supplementary Materials for

**Non-invasive electrical stimulation restores corneal nerve density in diabetic neuropathy by promoting axon growth in trigeminal ganglia neurons**

Menglu Yang *et al.*

\*Corresponding author. Dong Feng Chen, [dongfeng\\_chen@meei.harvard.edu](mailto:dongfeng_chen@meei.harvard.edu); Menglu Yang, [menglu\\_yang@meei.harvard.edu](mailto:menglu_yang@meei.harvard.edu)

**This PDF file includes:**  
Figs. S1 to S7

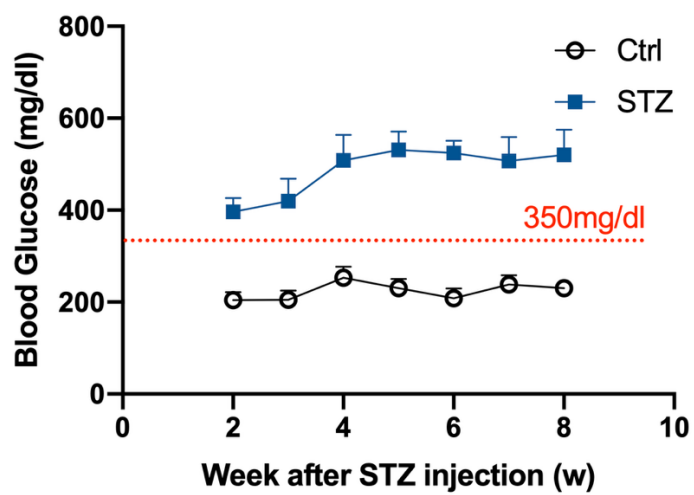

**Fig. S1.**

Blood glucose measurement of STZ model. Random blood glucose > 350mg/dl is regarded as diabetic.

GAP43 Raw Image

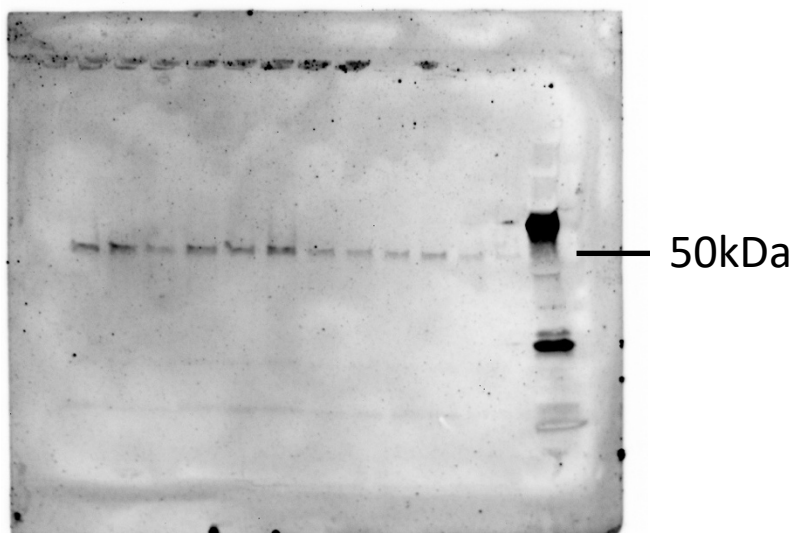

GAPDH Raw Image

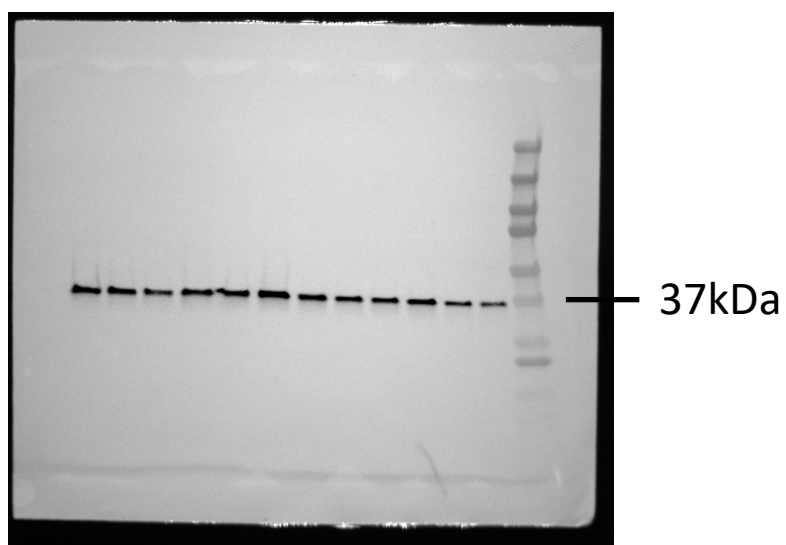

**Fig. S2.**

Raw Western blot image of Fig 2.

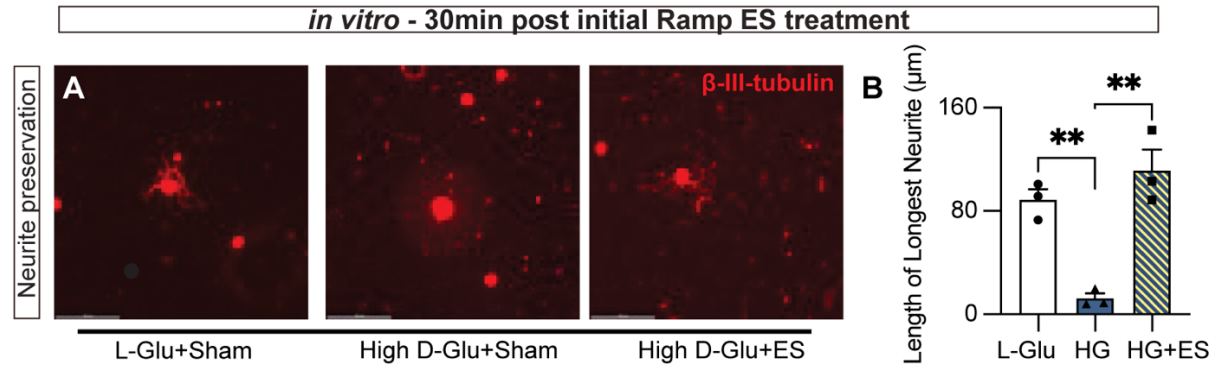

**Fig. S3.**

*In vitro* ES treatment in high glucose (100mM) condition. L-glucose 100mM served as osmolarity control (A). The length of longest neurite of quantified in (B). n=3. \*\*,  $p<0.01$ .

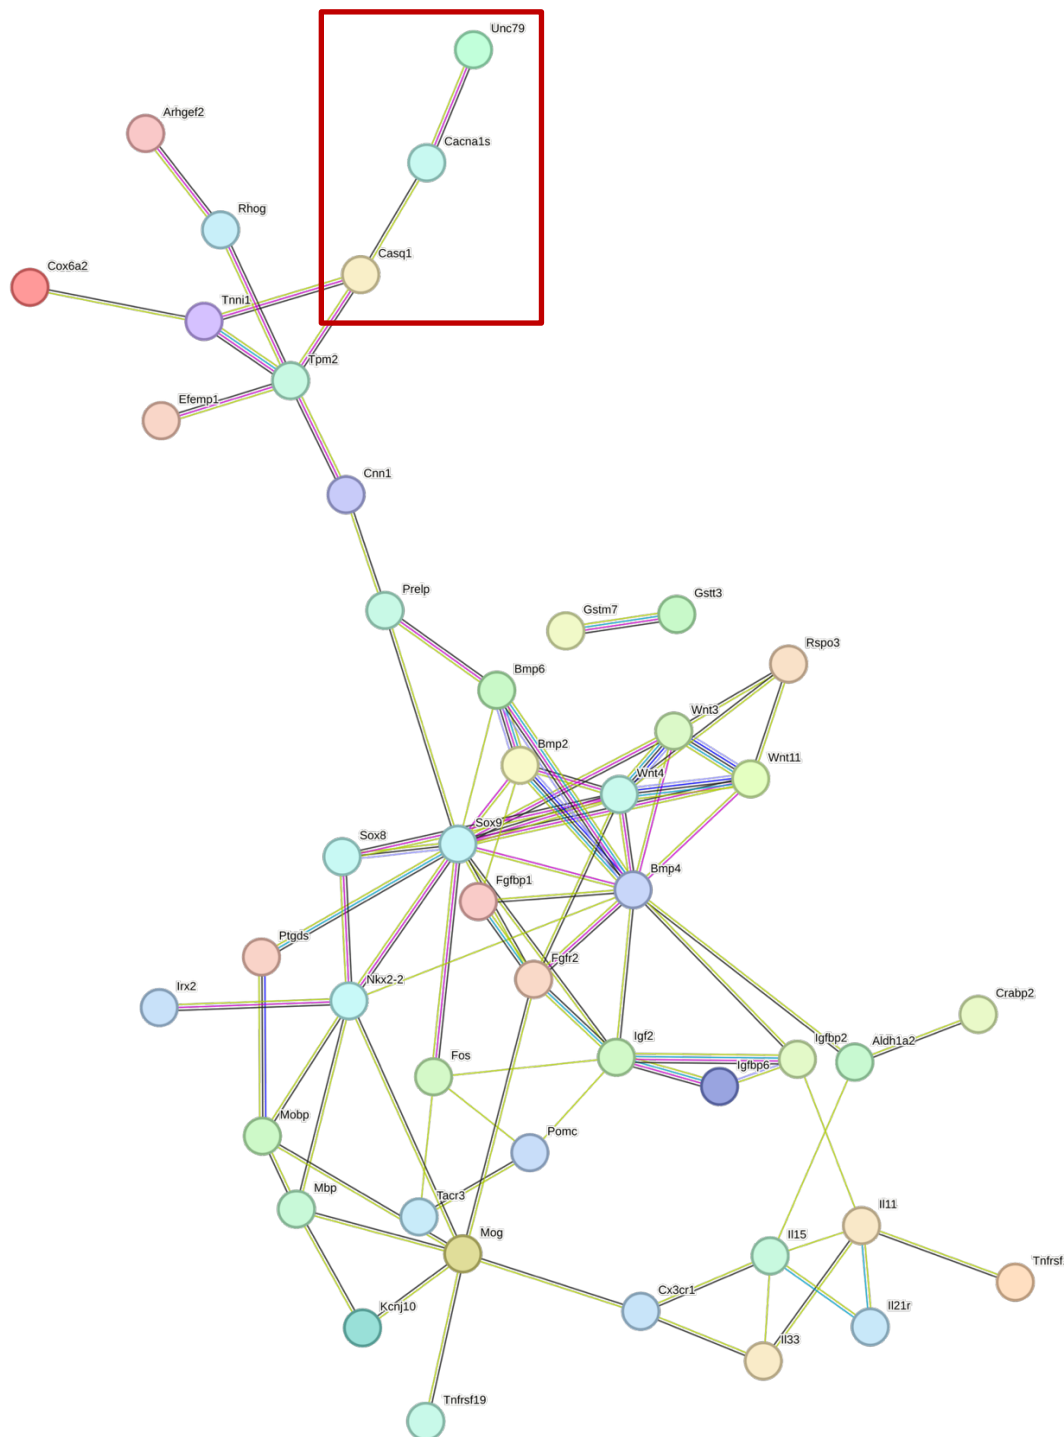

**Fig. S4.**

Gene network analysis of DEGs identified between the TGs from sham-treated and ES-treated keratectomy injury. Genes related to membrane potential and  $\text{Ca}^{2+}$  signaling are highlighted in the red box.

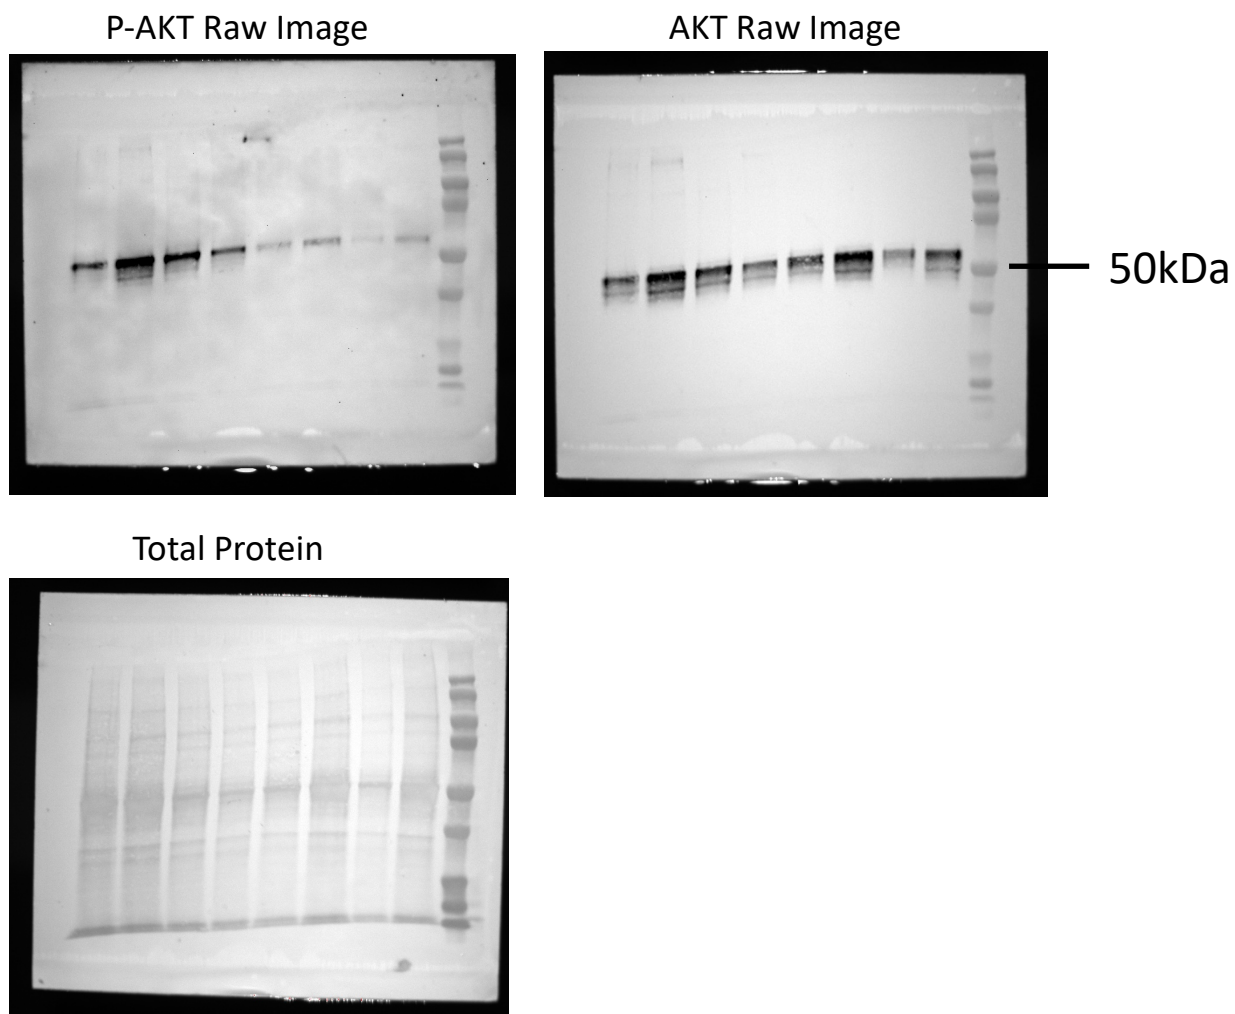

**Fig. S5.**  
Raw Western blot image of Fig 3.

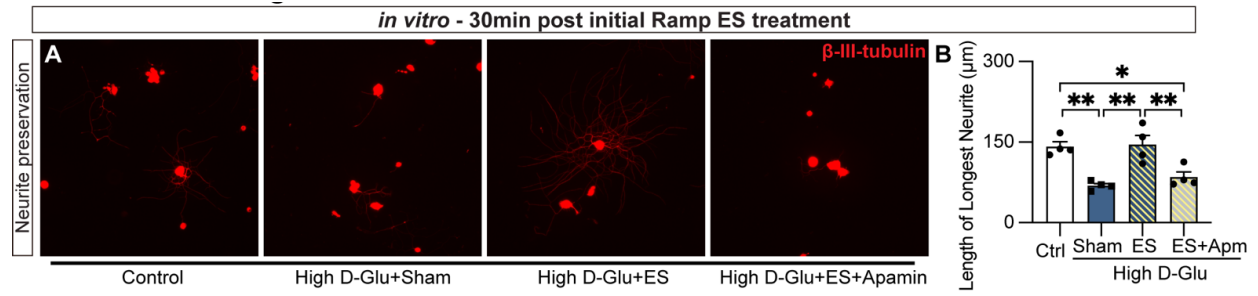

**Fig. S6.**

*In vitro* ES treatment in normal glucose control and high glucose (100mM) condition, with sham, ES, ES combined with Apamin treatments (A). The length of longest neurite of quantified in (B). n=4. \*,  $p<0.05$ ; \*\*,  $p<0.01$ .

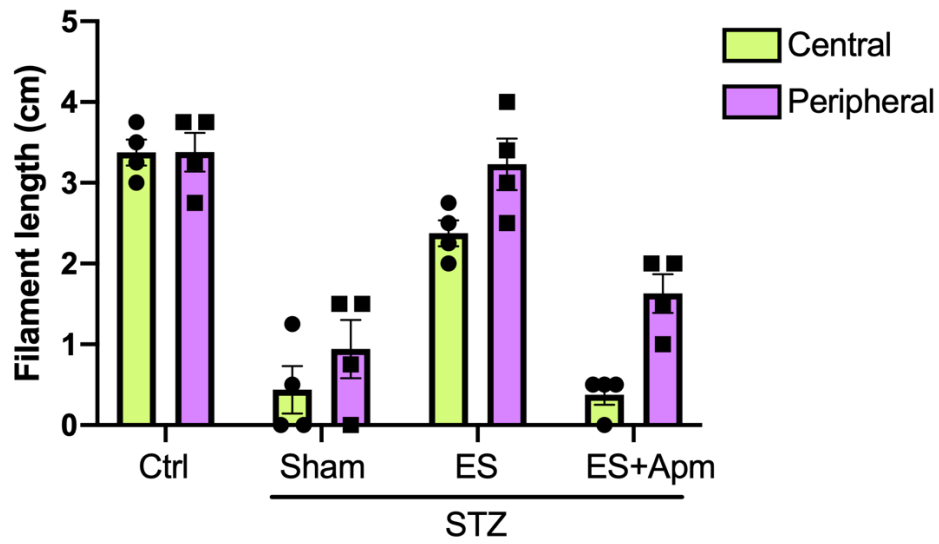

**Fig. S7.**

Cochet-Bonnet esthesiometer result from non-DM control, STZ-induced T1MD mice with sham treatment, ES treatment, and ES combined with Apamin, in central and peripheral cornea.
